# Supplementary material
Source: PubMed Central journal article supplement (PMC2593087)
Supplement: NIHMS60294-supplement-SI1.pdf [file NIHMS60294-supplement-SI1.pdf]

Supporting Information for

**Spectroscopic and DFT Investigation of [M{HB(3,5-  
<sup>i</sup>Pr<sub>2</sub>pz)<sub>3</sub>}(SC<sub>6</sub>F<sub>5</sub>)] (M = Mn, Fe, Co, Ni, Cu, and Zn) Model  
Complexes: Periodic Trends in Metal-thiolate Bonding**

Serge I. Gorelsky, Lipika Basumallick, Josh Vura-Weis, Ritimukta Sarangi, Britt Hedman, Keith O. Hodgson, Kiyoshi Fujisawa, Edward I. Solomon

The B3LYP/6-311+G(d) optimized geometries of the  $[M(\text{HB}(\text{pz})_3)(\text{SC}_6\text{F}_5)]$  complexes (the xyz atomic coordinates are given in Å)

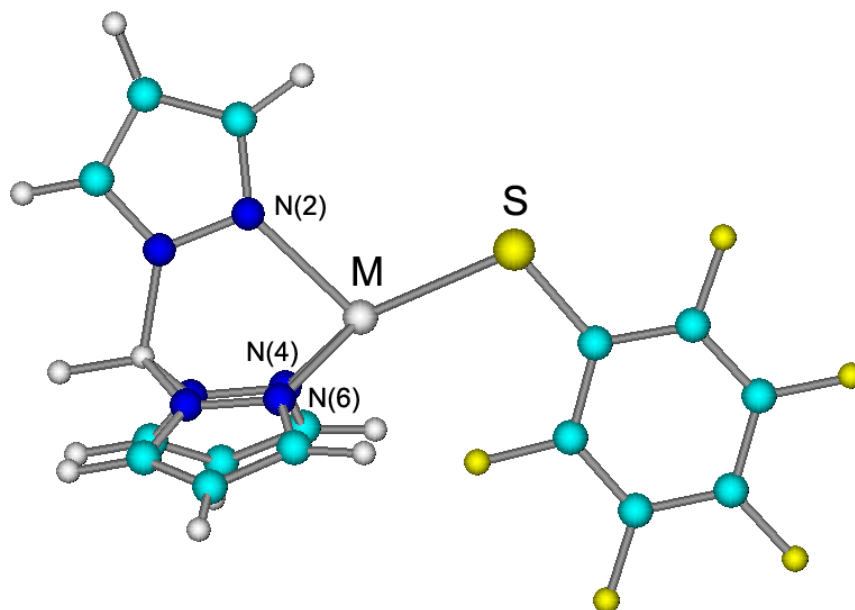

$[\text{MnL}(\text{SC}_6\text{F}_5)]$

|    |           |           |           |
|----|-----------|-----------|-----------|
| Mn | -0.550621 | -0.797122 | 0.000000  |
| N  | -1.686097 | -2.656742 | 0.000000  |
| N  | -0.927471 | -3.788978 | 0.000000  |
| N  | 0.732907  | -1.673941 | 1.513934  |
| N  | 1.104626  | -2.962602 | 1.268845  |
| N  | 0.732907  | -1.673941 | -1.513934 |
| N  | 1.104626  | -2.962602 | -1.268845 |
| C  | -2.965500 | -3.046750 | 0.000000  |
| C  | -3.050914 | -4.443770 | 0.000000  |
| C  | -1.731290 | -4.871415 | 0.000000  |
| C  | 1.306704  | -1.317492 | 2.668061  |
| C  | 2.060047  | -2.376129 | 3.187767  |
| C  | 1.902134  | -3.399105 | 2.264465  |
| C  | 1.306704  | -1.317492 | -2.668061 |
| C  | 2.060047  | -2.376129 | -3.187767 |
| C  | 1.902134  | -3.399105 | -2.264465 |
| B  | 0.624373  | -3.720875 | 0.000000  |
| H  | 1.152584  | -0.324744 | 3.065135  |
| H  | 2.636354  | -2.395063 | 4.098925  |
| H  | 1.152584  | -0.324744 | -3.065135 |
| H  | 2.636354  | -2.395063 | -4.098925 |
| H  | 1.075787  | -4.829769 | 0.000000  |
| H  | -3.756375 | -2.310595 | 0.000000  |
| H  | -3.940373 | -5.053368 | 0.000000  |
| H  | 2.301181  | -4.401544 | -2.247672 |
| H  | 2.301181  | -4.401544 | 2.247672  |
| H  | -1.312108 | -5.865796 | 0.000000  |
| S  | -1.938428 | 1.153774  | 0.000000  |
| C  | -0.862718 | 2.551874  | 0.000000  |
| C  | -1.388893 | 3.853081  | 0.000000  |
| C  | -0.582479 | 4.983048  | 0.000000  |
| C  | 0.802024  | 4.855454  | 0.000000  |
| C  | 1.362407  | 3.584959  | 0.000000  |

|   |           |          |          |
|---|-----------|----------|----------|
| C | 0.532568  | 2.474382 | 0.000000 |
| F | -2.716067 | 4.036827 | 0.000000 |
| F | -1.132584 | 6.203736 | 0.000000 |
| F | 1.584250  | 5.941796 | 0.000000 |
| F | 2.694786  | 3.439309 | 0.000000 |
| F | 1.132173  | 1.253159 | 0.000000 |

[FeL(SC<sub>6</sub>F<sub>5</sub>)]

|    |           |           |           |
|----|-----------|-----------|-----------|
| Fe | -0.448243 | -0.789274 | 0.000000  |
| N  | -1.657785 | -2.524912 | 0.000000  |
| N  | -0.976727 | -3.704543 | 0.000000  |
| N  | 0.718490  | -1.665165 | 1.519932  |
| N  | 1.073575  | -2.957337 | 1.270077  |
| N  | 0.718490  | -1.665165 | -1.519932 |
| N  | 1.073575  | -2.957337 | -1.270077 |
| C  | -2.960245 | -2.828125 | 0.000000  |
| C  | -3.137111 | -4.216777 | 0.000000  |
| C  | -1.848380 | -4.732242 | 0.000000  |
| C  | 1.305493  | -1.312907 | 2.668119  |
| C  | 2.053155  | -2.379859 | 3.179924  |
| C  | 1.877450  | -3.400759 | 2.257840  |
| C  | 1.305493  | -1.312907 | -2.668119 |
| C  | 2.053155  | -2.379859 | -3.179924 |
| C  | 1.877450  | -3.400759 | -2.257840 |
| B  | 0.572350  | -3.704789 | 0.000000  |
| H  | 1.163240  | -0.319203 | 3.066812  |
| H  | 2.635529  | -2.405197 | 4.087018  |
| H  | 1.163240  | -0.319203 | -3.066812 |
| H  | 2.635529  | -2.405197 | -4.087018 |
| H  | 0.989576  | -4.826721 | 0.000000  |
| H  | -3.698422 | -2.039433 | 0.000000  |
| H  | -4.064831 | -4.766467 | 0.000000  |
| H  | 2.266137  | -4.407152 | -2.237174 |
| H  | 2.266137  | -4.407152 | 2.237174  |
| H  | -1.496619 | -5.752530 | 0.000000  |
| S  | -1.851919 | 1.040386  | 0.000000  |
| C  | -0.825453 | 2.480896  | 0.000000  |
| C  | -1.390762 | 3.764233  | 0.000000  |
| C  | -0.617497 | 4.917519  | 0.000000  |
| C  | 0.770089  | 4.829578  | 0.000000  |
| C  | 1.368505  | 3.576138  | 0.000000  |
| C  | 0.570714  | 2.442617  | 0.000000  |
| F  | -2.722943 | 3.908514  | 0.000000  |
| F  | -1.202065 | 6.121933  | 0.000000  |
| F  | 1.519782  | 5.938272  | 0.000000  |
| F  | 2.704483  | 3.470305  | 0.000000  |
| F  | 1.201198  | 1.237378  | 0.000000  |

[CoL(SC<sub>6</sub>F<sub>5</sub>)]

|    |           |           |           |
|----|-----------|-----------|-----------|
| Co | -0.467114 | -0.835205 | 0.000000  |
| N  | -1.660116 | -2.528281 | 0.000000  |
| N  | -0.945858 | -3.688050 | 0.000000  |
| N  | 0.736804  | -1.599546 | 1.487314  |
| N  | 1.095381  | -2.896021 | 1.266203  |
| N  | 0.736804  | -1.599546 | -1.487314 |
| N  | 1.095381  | -2.896021 | -1.266203 |
| C  | -2.952676 | -2.862648 | 0.000000  |
| C  | -3.092842 | -4.256977 | 0.000000  |
| C  | -1.792749 | -4.738598 | 0.000000  |
| C  | 1.315798  | -1.219654 | 2.628833  |
| C  | 2.062406  | -2.274943 | 3.168064  |
| C  | 1.894513  | -3.316481 | 2.268335  |
| C  | 1.315798  | -1.219654 | -2.628833 |
| C  | 2.062406  | -2.274943 | -3.168064 |
| C  | 1.894513  | -3.316481 | -2.268335 |
| B  | 0.606721  | -3.658742 | 0.000000  |

|   |           |           |           |
|---|-----------|-----------|-----------|
| H | 1.169004  | -0.217488 | 3.003345  |
| H | 2.640570  | -2.278468 | 4.078184  |
| H | 1.169004  | -0.217488 | -3.003345 |
| H | 2.640570  | -2.278468 | -4.078184 |
| H | 1.041571  | -4.773444 | 0.000000  |
| H | -3.711290 | -2.093657 | 0.000000  |
| H | -4.006481 | -4.829666 | 0.000000  |
| H | 2.286953  | -4.321616 | -2.270988 |
| H | 2.286953  | -4.321616 | 2.270988  |
| H | -1.413786 | -5.748956 | 0.000000  |
| S | -1.831753 | 0.984963  | 0.000000  |
| C | -0.822473 | 2.433960  | 0.000000  |
| C | -1.407680 | 3.708295  | 0.000000  |
| C | -0.652809 | 4.873427  | 0.000000  |
| C | 0.735780  | 4.806056  | 0.000000  |
| C | 1.352725  | 3.561674  | 0.000000  |
| C | 0.574655  | 2.413813  | 0.000000  |
| F | -2.742338 | 3.830405  | 0.000000  |
| F | -1.256097 | 6.068527  | 0.000000  |
| F | 1.468750  | 5.925721  | 0.000000  |
| F | 2.690180  | 3.476853  | 0.000000  |
| F | 1.222892  | 1.222592  | 0.000000  |

### [NiL(SC<sub>6</sub>F<sub>5</sub>)]

|    |           |           |           |
|----|-----------|-----------|-----------|
| Ni | -0.348922 | -0.766098 | 0.000000  |
| N  | -1.625444 | -2.359575 | 0.000000  |
| N  | -1.041019 | -3.586734 | 0.000000  |
| N  | 0.783297  | -1.659049 | 1.435990  |
| N  | 1.050744  | -2.978513 | 1.255980  |
| N  | 0.783297  | -1.659049 | -1.435990 |
| N  | 1.050744  | -2.978513 | -1.255980 |
| C  | -2.946760 | -2.549736 | 0.000000  |
| C  | -3.236284 | -3.920877 | 0.000000  |
| C  | -1.995397 | -4.540029 | 0.000000  |
| C  | 1.354610  | -1.292851 | 2.586376  |
| C  | 2.006933  | -2.386475 | 3.170420  |
| C  | 1.786153  | -3.435150 | 2.289804  |
| C  | 1.354610  | -1.292851 | -2.586376 |
| C  | 2.006933  | -2.386475 | -3.170420 |
| C  | 1.786153  | -3.435150 | -2.289804 |
| B  | 0.505594  | -3.709249 | 0.000000  |
| H  | 1.271100  | -0.274181 | 2.935000  |
| H  | 2.558906  | -2.409618 | 4.096399  |
| H  | 1.271100  | -0.274181 | -2.935000 |
| H  | 2.558906  | -2.409618 | -4.096399 |
| H  | 0.839033  | -4.858621 | 0.000000  |
| H  | -3.617233 | -1.702995 | 0.000000  |
| H  | -4.206532 | -4.391314 | 0.000000  |
| H  | 2.099398  | -4.467066 | -2.327311 |
| H  | 2.099398  | -4.467066 | 2.327311  |
| H  | -1.726849 | -5.585183 | 0.000000  |
| S  | -1.815812 | 0.968626  | 0.000000  |
| C  | -0.808983 | 2.417776  | 0.000000  |
| C  | -1.382408 | 3.697508  | 0.000000  |
| C  | -0.614366 | 4.854358  | 0.000000  |
| C  | 0.773777  | 4.772817  | 0.000000  |
| C  | 1.379943  | 3.522605  | 0.000000  |
| C  | 0.587450  | 2.385946  | 0.000000  |
| F  | -2.714663 | 3.833645  | 0.000000  |
| F  | -1.204196 | 6.055567  | 0.000000  |
| F  | 1.517232  | 5.884740  | 0.000000  |
| F  | 2.715816  | 3.424251  | 0.000000  |
| F  | 1.221600  | 1.181836  | 0.000000  |

### [CuL(SC<sub>6</sub>F<sub>5</sub>)]

|    |           |           |          |
|----|-----------|-----------|----------|
| Cu | -0.324083 | -0.809917 | 0.000000 |
| N  | -1.684349 | -2.577237 | 0.000000 |

|   |           |           |           |
|---|-----------|-----------|-----------|
| N | -0.993949 | -3.749038 | 0.000000  |
| N | 0.781502  | -1.681457 | 1.442125  |
| N | 1.067681  | -2.995892 | 1.257737  |
| N | 0.781502  | -1.681457 | -1.442125 |
| N | 1.067681  | -2.995892 | -1.257737 |
| C | -2.978366 | -2.898388 | 0.000000  |
| C | -3.145134 | -4.292943 | 0.000000  |
| C | -1.853575 | -4.792789 | 0.000000  |
| C | 1.335598  | -1.311908 | 2.599891  |
| C | 1.993527  | -2.399914 | 3.187307  |
| C | 1.796629  | -3.446705 | 2.298492  |
| C | 1.335598  | -1.311908 | -2.599891 |
| C | 1.993527  | -2.399914 | -3.187307 |
| C | 1.796629  | -3.446705 | -2.298492 |
| B | 0.551197  | -3.751710 | 0.000000  |
| H | 1.237536  | -0.294936 | 2.949236  |
| H | 2.535380  | -2.420603 | 4.119383  |
| H | 1.237536  | -0.294936 | -2.949236 |
| H | 2.535380  | -2.420603 | -4.119383 |
| H | 0.966178  | -4.875438 | 0.000000  |
| H | -3.728237 | -2.120091 | 0.000000  |
| H | -4.067432 | -4.852274 | 0.000000  |
| H | 2.122467  | -4.474687 | -2.334520 |
| H | 2.122467  | -4.474687 | 2.334520  |
| H | -1.487999 | -5.808290 | 0.000000  |
| S | -1.618957 | 0.973434  | 0.000000  |
| C | -0.717441 | 2.484578  | 0.000000  |
| C | -1.421682 | 3.701608  | 0.000000  |
| C | -0.779424 | 4.931091  | 0.000000  |
| C | 0.610025  | 4.985789  | 0.000000  |
| C | 1.342252  | 3.804270  | 0.000000  |
| C | 0.681931  | 2.584337  | 0.000000  |
| F | -2.758225 | 3.700846  | 0.000000  |
| F | -1.486012 | 6.065835  | 0.000000  |
| F | 1.236071  | 6.163612  | 0.000000  |
| F | 2.679141  | 3.852272  | 0.000000  |
| F | 1.439186  | 1.476501  | 0.000000  |

[ZnL(SC<sub>6</sub>F<sub>5</sub>)]

|    |           |           |           |
|----|-----------|-----------|-----------|
| Zn | -0.525210 | -0.826508 | 0.000000  |
| N  | -1.628963 | -2.610650 | 0.000000  |
| N  | -0.863399 | -3.736170 | 0.000000  |
| N  | 0.718168  | -1.581138 | 1.483718  |
| N  | 1.139311  | -2.857113 | 1.264390  |
| N  | 0.718168  | -1.581138 | -1.483718 |
| N  | 1.139311  | -2.857113 | -1.264390 |
| C  | -2.905274 | -3.003574 | 0.000000  |
| C  | -2.982511 | -4.402088 | 0.000000  |
| C  | -1.661096 | -4.823487 | 0.000000  |
| C  | 1.261892  | -1.179179 | 2.634968  |
| C  | 2.048833  | -2.200181 | 3.181734  |
| C  | 1.941056  | -3.245494 | 2.276512  |
| C  | 1.261892  | -1.179179 | -2.634968 |
| C  | 2.048833  | -2.200181 | -3.181734 |
| C  | 1.941056  | -3.245494 | -2.276512 |
| B  | 0.686836  | -3.639063 | 0.000000  |
| H  | 1.064585  | -0.185753 | 3.009807  |
| H  | 2.614762  | -2.180163 | 4.099304  |
| H  | 1.064585  | -0.185753 | -3.009807 |
| H  | 2.614762  | -2.180163 | -4.099304 |
| H  | 1.168295  | -4.734806 | 0.000000  |
| H  | -3.698732 | -2.270454 | 0.000000  |
| H  | -3.868928 | -5.016050 | 0.000000  |
| H  | 2.377722  | -4.232226 | -2.282523 |
| H  | 2.377722  | -4.232226 | 2.282523  |
| H  | -1.236472 | -5.815545 | 0.000000  |
| S  | -1.858841 | 1.020660  | 0.000000  |
| C  | -0.816037 | 2.447871  | 0.000000  |

|   |           |          |          |
|---|-----------|----------|----------|
| C | -1.403648 | 3.722149 | 0.000000 |
| C | -0.654404 | 4.890339 | 0.000000 |
| C | 0.734198  | 4.829006 | 0.000000 |
| C | 1.353346  | 3.586675 | 0.000000 |
| C | 0.581679  | 2.433296 | 0.000000 |
| F | -2.739073 | 3.840174 | 0.000000 |
| F | -1.263955 | 6.082311 | 0.000000 |
| F | 1.463348  | 5.951337 | 0.000000 |
| F | 2.691140  | 3.505375 | 0.000000 |
| F | 1.240564  | 1.251195 | 0.000000 |

Calculated electronic energy (E, a.u.), HOMO/LUMO energies, metal-ligand distances (Å), atomic charges, q(NPA) and spin densities, s(MPA) and s(NPA), at the B3LYP/6-311+G(d) levels.

### [MnL(SC<sub>6</sub>F<sub>5</sub>)]

E= -2979.9140267 a.u.

Alpha HOMO= -5.803 eV, LUMO= -1.001 eV, Gap= 4.802 eV

Beta HOMO= -6.049 eV, LUMO= -1.642 eV, Gap= 4.407 eV

--- GEOMETRY ---

M-S      M-N(ax)    M-N(eq)

2.394    2.179      2.170

|         | Mn(1) | N(2)   | N(4)   | N(6)   | S(28)  | F(35)  | F(39)  | SC6F5  |
|---------|-------|--------|--------|--------|--------|--------|--------|--------|
| q(NPA): | 1.369 | -0.449 | -0.449 | -0.449 | -0.356 | -0.321 | -0.349 | -0.678 |
| s(MPA): | 4.880 | -0.001 | 0.006  | 0.006  | -0.001 | -0.001 | -0.009 | 0.055  |
| s(NPA): | 4.620 | 0.056  | 0.049  | 0.049  | 0.088  | 0.001  | 0.016  | 0.133  |

### [FeL(SC<sub>6</sub>F<sub>5</sub>)]

E= -3092.6035539 a.u.

Alpha HOMO= -5.920 eV, LUMO= -1.002 eV, Gap= 4.917 eV

Beta HOMO= -6.039 eV, LUMO= -2.351 eV, Gap= 3.688 eV

--- GEOMETRY ---

M-S      M-N(ax)    M-N(eq)

2.306    2.116      2.107

|         | Fe(1) | N(2)   | N(4)   | N(6)   | S(28)  | F(35)  | F(39)  | SC6F5  |
|---------|-------|--------|--------|--------|--------|--------|--------|--------|
| q(NPA): | 1.300 | -0.433 | -0.440 | -0.440 | -0.320 | -0.321 | -0.348 | -0.644 |
| s(MPA): | 3.743 | 0.051  | 0.037  | 0.037  | 0.061  | 0.000  | -0.004 | 0.112  |
| s(NPA): | 3.578 | 0.074  | 0.065  | 0.065  | 0.129  | 0.001  | 0.014  | 0.164  |

### [CoL(SC<sub>6</sub>F<sub>5</sub>)]

E= -3211.6515757 a.u.

Alpha HOMO= -5.966 eV, LUMO= -0.989 eV, Gap= 4.977 eV

Beta HOMO= -6.031 eV, LUMO= -2.816 eV, Gap= 3.215 eV

--- GEOMETRY ---

M-S      M-N(ax)    M-N(eq)

2.275    2.071      2.061

|         | Co(1) | N(2)   | N(4)   | N(6)   | S(28)  | F(35)  | F(39)  | SC6F5  |
|---------|-------|--------|--------|--------|--------|--------|--------|--------|
| q(NPA): | 1.271 | -0.429 | -0.432 | -0.432 | -0.307 | -0.321 | -0.343 | -0.623 |
| s(MPA): | 2.684 | 0.073  | 0.056  | 0.056  | 0.119  | 0.000  | 0.000  | 0.132  |
| s(NPA): | 2.575 | 0.079  | 0.071  | 0.071  | 0.157  | 0.001  | 0.009  | 0.186  |

### [NiL(SC<sub>6</sub>F<sub>5</sub>)]

E= -3337.1880487 a.u.

Alpha HOMO= -6.087 eV, LUMO= -1.065 eV, Gap= 5.022 eV

Beta HOMO= -6.220 eV, LUMO= -2.842 eV, Gap= 3.378 eV

--- GEOMETRY ---

M-S M-N(ax) M-N(eq)  
2.272 2.042 2.035

Ni(1) N(2) N(4) N(6) S(28) F(35) F(39) SC6F5  
q(NPA): 1.236 -0.405 -0.417 -0.417 -0.324 -0.320 -0.346 -0.634  
s(MPA): 1.569 0.114 0.091 0.091 0.100 0.001 -0.001 0.167  
s(NPA): 1.571 0.111 0.082 0.082 0.121 0.001 0.012 0.159

[CuL(SC<sub>6</sub>F<sub>5</sub>)]

E= -3469.3462528 a.u.

Alpha HOMO= -6.624 eV, LUMO= -1.230 eV, Gap= 5.394 eV

Beta HOMO= -6.678 eV, LUMO= -4.296 eV, Gap= 2.382 eV

--- GEOMETRY ---

M-S M-N(ax) M-N(eq)  
2.204 2.230 2.015

Cu(1) N(2) N(4) N(6) S(28) F(35) F(39) SC6F5  
q(NPA): 1.127 -0.425 -0.415 -0.415 -0.189 -0.316 -0.325 -0.432  
s(MPA): 0.439 -0.001 0.076 0.076 0.292 0.002 0.005 0.408  
s(NPA): 0.470 -0.001 0.075 0.075 0.307 0.004 0.005 0.384

[ZnL(SC<sub>6</sub>F<sub>5</sub>)]

E= -3608.2315374 a.u.

HOMO= -6.041 eV, LUMO= -0.999 eV, Gap= 5.042 eV

--- GEOMETRY ---

M-S M-N(ax) M-N(eq)  
2.278 2.098 2.078

Zn(1) N(2) N(4) N(6) S(28) F(35) F(39) SC6F5  
q(NPA): 1.513 -0.480 -0.478 -0.478 -0.404 -0.322 -0.343 -0.724

The B3LYP/6-311+G(d) optimized geometries of the [M(HB(pz)<sub>3</sub>)F] complexes (the xyz atomic coordinates are given in Å)

[Mn(L)F]

|    |           |           |           |
|----|-----------|-----------|-----------|
| Mn | 0.000869  | 1.615515  | 0.000000  |
| N  | -1.749483 | 0.309675  | 0.000000  |
| N  | -1.465598 | -1.023246 | 0.000000  |
| N  | 0.876556  | 0.308754  | 1.514619  |
| N  | 0.732422  | -1.024105 | 1.268693  |
| N  | 0.876556  | 0.308754  | -1.514619 |
| N  | 0.732422  | -1.024105 | -1.268693 |
| C  | -3.081634 | 0.422364  | 0.000000  |
| C  | -3.680594 | -0.843346 | 0.000000  |
| C  | -2.614163 | -1.730160 | 0.000000  |
| C  | 1.542051  | 0.420191  | 2.668722  |
| C  | 1.838987  | -0.845954 | 3.187697  |
| C  | 1.304609  | -1.731861 | 2.263957  |
| C  | 1.542051  | 0.420191  | -2.668722 |
| C  | 1.838987  | -0.845954 | -3.187697 |
| C  | 1.304609  | -1.731861 | -2.263957 |
| B  | -0.000819 | -1.542057 | 0.000000  |

|   |           |           |           |
|---|-----------|-----------|-----------|
| H | 1.773122  | 1.397980  | 3.066207  |
| H | 2.364417  | -1.082925 | 4.099094  |
| H | 1.773122  | 1.397980  | -3.066207 |
| H | 2.364417  | -1.082925 | -4.099094 |
| H | -0.002209 | -2.739910 | 0.000000  |
| H | -3.540361 | 1.400613  | 0.000000  |
| H | -4.732804 | -1.079466 | 0.000000  |
| H | 1.292782  | -2.810751 | -2.246780 |
| H | 1.292782  | -2.810751 | 2.246780  |
| H | -2.594203 | -2.809078 | 0.000000  |
| F | 0.000197  | 3.483323  | 0.000000  |

### [Fe(L)F]

|    |           |           |           |
|----|-----------|-----------|-----------|
| Fe | -1.553025 | 0.137403  | 0.000000  |
| N  | -0.106230 | 1.724635  | 0.000000  |
| N  | 1.193069  | 1.320790  | 0.000000  |
| N  | -0.404286 | -0.850430 | 1.480695  |
| N  | 0.940731  | -0.856007 | 1.264208  |
| N  | -0.404286 | -0.850430 | -1.480695 |
| N  | 0.940731  | -0.856007 | -1.264208 |
| C  | -0.100018 | 3.058546  | 0.000000  |
| C  | 1.217968  | 3.541029  | 0.000000  |
| C  | 2.005047  | 2.401385  | 0.000000  |
| C  | -0.617388 | -1.497772 | 2.631035  |
| C  | 0.596114  | -1.931639 | 3.177907  |
| C  | 1.557034  | -1.502226 | 2.273904  |
| C  | -0.617388 | -1.497772 | -2.631035 |
| C  | 0.596114  | -1.931639 | -3.177907 |
| C  | 1.557034  | -1.502226 | -2.273904 |
| B  | 1.552575  | -0.185166 | 0.000000  |
| H  | -1.623417 | -1.615981 | 3.006636  |
| H  | 0.752249  | -2.477639 | 4.094584  |
| H  | -1.623417 | -1.615981 | -3.006636 |
| H  | 0.752249  | -2.477639 | -4.094584 |
| H  | 2.741543  | -0.327537 | 0.000000  |
| H  | -1.033698 | 3.601982  | 0.000000  |
| H  | 1.547191  | 4.567998  | 0.000000  |
| H  | 2.630436  | -1.612486 | -2.279896 |
| H  | 2.630436  | -1.612486 | 2.279896  |
| H  | 3.077501  | 2.282193  | 0.000000  |
| F  | -3.280055 | 0.709663  | 0.000000  |

### [Co(L)F]

|    |           |           |           |
|----|-----------|-----------|-----------|
| Co | 1.465439  | 0.006016  | 0.000000  |
| N  | 0.305861  | 1.716344  | 0.000000  |
| N  | -1.031780 | 1.458206  | 0.000000  |
| N  | 0.315377  | -0.856296 | 1.484832  |
| N  | -1.023728 | -0.734297 | 1.265412  |
| N  | 0.315377  | -0.856296 | -1.484832 |
| N  | -1.023728 | -0.734297 | -1.265412 |
| C  | 0.451707  | 3.042870  | 0.000000  |
| C  | -0.802990 | 3.668184  | 0.000000  |
| C  | -1.713644 | 2.622975  | 0.000000  |
| C  | 0.468149  | -1.520906 | 2.631972  |
| C  | -0.783148 | -1.841663 | 3.176510  |
| C  | -1.699310 | -1.322347 | 2.275013  |
| C  | 0.468149  | -1.520906 | -2.631972 |
| C  | -0.783148 | -1.841663 | -3.176510 |
| C  | -1.699310 | -1.322347 | -2.275013 |
| B  | -1.560349 | -0.004774 | 0.000000  |
| H  | 1.459337  | -1.732923 | 3.005190  |
| H  | -0.989713 | -2.373311 | 4.091629  |
| H  | 1.459337  | -1.732923 | -3.005190 |
| H  | -0.989713 | -2.373311 | -4.091629 |
| H  | -2.757234 | -0.008593 | 0.000000  |
| H  | 1.440754  | 3.476960  | 0.000000  |
| H  | -1.015219 | 4.725411  | 0.000000  |
| H  | -2.778294 | -1.330058 | -2.281263 |
| H  | -2.778294 | -1.330058 | 2.281263  |



|   |           |          |          |
|---|-----------|----------|----------|
| H | -2.792675 | 2.626560 | 0.000000 |
| F | 3.281803  | 0.019439 | 0.000000 |

[Ni(L)F]

|    |           |           |           |
|----|-----------|-----------|-----------|
| Ni | 1.441576  | 0.120960  | 0.000000  |
| N  | 0.126449  | 1.660903  | 0.000000  |
| N  | -1.191773 | 1.333252  | 0.000000  |
| N  | 0.352775  | -0.821934 | 1.432403  |
| N  | -0.993986 | -0.836038 | 1.255767  |
| N  | 0.352775  | -0.821934 | -1.432403 |
| N  | -0.993986 | -0.836038 | -1.255767 |
| C  | 0.207092  | 2.993054  | 0.000000  |
| C  | -1.078931 | 3.551130  | 0.000000  |
| C  | -1.934536 | 2.459328  | 0.000000  |
| C  | 0.609509  | -1.456478 | 2.578998  |
| C  | -0.585875 | -1.895854 | 3.163897  |
| C  | -1.577271 | -1.478305 | 2.288119  |
| C  | 0.609509  | -1.456478 | -2.578998 |
| C  | -0.585875 | -1.895854 | -3.163897 |
| C  | -1.577271 | -1.478305 | -2.288119 |
| B  | -1.609499 | -0.161661 | 0.000000  |
| H  | 1.627896  | -1.563198 | 2.922766  |
| H  | -0.709771 | -2.437306 | 4.088127  |
| H  | 1.627896  | -1.563198 | -2.922766 |
| H  | -0.709771 | -2.437306 | -4.088127 |
| H  | -2.801458 | -0.270232 | 0.000000  |
| H  | 1.173509  | 3.475221  | 0.000000  |
| H  | -1.345831 | 4.595897  | 0.000000  |
| H  | -2.649556 | -1.592228 | -2.328435 |
| H  | -2.649556 | -1.592228 | 2.328435  |
| H  | -3.012310 | 2.406124  | 0.000000  |
| F  | 3.227605  | 0.510999  | 0.000000  |

[Cu(L)F]

|    |           |           |           |
|----|-----------|-----------|-----------|
| Cu | 1.419324  | -0.400186 | 0.000000  |
| N  | 0.534559  | 1.661732  | 0.000000  |
| N  | -0.825736 | 1.641659  | 0.000000  |
| N  | 0.132867  | -0.916716 | 1.419608  |
| N  | -1.156434 | -0.526927 | 1.254528  |
| N  | 0.132867  | -0.916716 | -1.419608 |
| N  | -1.156434 | -0.526927 | -1.254528 |
| C  | 0.897813  | 2.943375  | 0.000000  |
| C  | -0.232123 | 3.779141  | 0.000000  |
| C  | -1.306985 | 2.906087  | 0.000000  |
| C  | 0.214370  | -1.568725 | 2.583379  |
| C  | -1.044195 | -1.605367 | 3.194731  |
| C  | -1.881225 | -0.932444 | 2.315351  |
| C  | 0.214370  | -1.568725 | -2.583379 |
| C  | -1.044195 | -1.605367 | -3.194731 |
| C  | -1.881225 | -0.932444 | -2.315351 |
| B  | -1.577463 | 0.295365  | 0.000000  |
| H  | 1.159683  | -1.971179 | 2.915839  |
| H  | -1.306769 | -2.056956 | 4.137937  |
| H  | 1.159683  | -1.971179 | -2.915839 |
| H  | -1.306769 | -2.056956 | -4.137937 |
| H  | -2.762362 | 0.467044  | 0.000000  |
| H  | 1.946395  | 3.204288  | 0.000000  |
| H  | -0.260930 | 4.857417  | 0.000000  |
| H  | -2.936310 | -0.714169 | -2.372322 |
| H  | -2.936310 | -0.714169 | 2.372322  |
| H  | -2.370138 | 3.092392  | 0.000000  |
| F  | 3.232144  | -0.379322 | 0.000000  |

[Zn(L)F]

|    |           |           |          |
|----|-----------|-----------|----------|
| Zn | 1.452540  | 0.002071  | 0.000000 |
| N  | 0.274022  | 1.714541  | 0.000000 |
| N  | -1.063244 | 1.459644  | 0.000000 |
| N  | 0.276405  | -0.857055 | 1.483946 |

|   |           |           |           |
|---|-----------|-----------|-----------|
| N | -1.061343 | -0.731527 | 1.264840  |
| N | 0.276405  | -0.857055 | -1.483946 |
| N | -1.061343 | -0.731527 | -1.264840 |
| C | 0.423377  | 3.040972  | 0.000000  |
| C | -0.829007 | 3.668958  | 0.000000  |
| C | -1.742209 | 2.624920  | 0.000000  |
| C | 0.428153  | -1.520395 | 2.632244  |
| C | -0.823051 | -1.836642 | 3.177429  |
| C | -1.738156 | -1.315655 | 2.274595  |
| C | 0.428153  | -1.520395 | -2.632244 |
| C | -0.823051 | -1.836642 | -3.177429 |
| C | -1.738156 | -1.315655 | -2.274595 |
| B | -1.594721 | -0.001322 | 0.000000  |
| H | 1.419145  | -1.734755 | 3.004773  |
| H | -1.031355 | -2.366371 | 4.093257  |
| H | 1.419145  | -1.734755 | -3.004773 |
| H | -1.031355 | -2.366371 | -4.093257 |
| H | -2.791840 | -0.001642 | 0.000000  |
| H | 1.413669  | 3.472322  | 0.000000  |
| H | -1.039324 | 4.726559  | 0.000000  |
| H | -2.817187 | -1.320301 | -2.281471 |
| H | -2.817187 | -1.320301 | 2.281471  |
| H | -2.821267 | 2.631204  | 0.000000  |
| F | 3.276926  | 0.004770  | 0.000000  |

Calculated electronic energy (E, a.u.), HOMO/LUMO energies (eV), metal-ligand distances (Å), atomic charges, q(NPA) and spin densities, s(MPA) and s(NPA), at the B3LYP/6-311+G(d) levels.

#### [Mn(L)F]

E= -1953.568956 a.u. S\*\*2= 8.755

Alpha HOMO= -6.637 LUMO= -0.653 Gap= 5.984 eV

Beta HOMO= -7.050 LUMO= -1.161 Gap= 5.889 eV

--- GEOMETRY ---

|       |       |       |       |
|-------|-------|-------|-------|
| 1-28  | 1-2   | 1-4   | 1-6   |
| 1.868 | 2.184 | 2.184 | 2.184 |

--- WATCHED ATOMS ---

|         | Mn(1) | N(2)   | N(4)   | N(6)   | F(28)  |
|---------|-------|--------|--------|--------|--------|
| q(NPA): | 1.548 | -0.451 | -0.451 | -0.451 | -0.800 |
| s(MPA): | 4.916 | -0.017 | -0.017 | -0.017 | 0.091  |
| s(NPA): | 4.683 | 0.038  | 0.038  | 0.038  | 0.120  |

#### [Fe(L)F]

E= -2066.258798 a.u. S\*\*2= 6.010

Alpha HOMO= -6.984 LUMO= -0.688 Gap= 6.296 eV

Beta HOMO= -5.558 LUMO= -1.665 Gap= 3.893 eV

--- GEOMETRY ---

|       |       |       |       |
|-------|-------|-------|-------|
| 1-28  | 1-2   | 1-4   | 1-6   |
| 1.819 | 2.148 | 2.118 | 2.118 |

--- WATCHED ATOMS ---

|         | Fe(1) | N(2)   | N(4)   | N(6)   | F(28)  |
|---------|-------|--------|--------|--------|--------|
| q(NPA): | 1.489 | -0.428 | -0.445 | -0.445 | -0.762 |
| s(MPA): | 3.823 | 0.034  | 0.015  | 0.015  | 0.129  |
| s(NPA): | 3.656 | 0.066  | 0.048  | 0.048  | 0.152  |

#### [Co(L)F]

E= -2185.300554 a.u. S\*\*2= 3.757

Alpha HOMO= -7.064 LUMO= -0.674 Gap= 6.390 eV

Beta HOMO= -6.619 LUMO= -2.145 Gap= 4.475 eV

--- GEOMETRY ---

|       |       |       |       |
|-------|-------|-------|-------|
| 1-28  | 1-2   | 1-4   | 1-6   |
| 1.816 | 2.066 | 2.067 | 2.067 |

--- WATCHED ATOMS ---

|         | Co(1) | N(2)   | N(4)   | N(6)   | F(28)  |
|---------|-------|--------|--------|--------|--------|
| q(NPA): | 1.465 | -0.432 | -0.432 | -0.432 | -0.771 |
| s(MPA): | 2.778 | 0.044  | 0.044  | 0.044  | 0.124  |
| s(NPA): | 2.663 | 0.067  | 0.066  | 0.066  | 0.131  |

### [Ni(L)F]

E= -2310.830622 a.u. S\*\*2= 2.004

Alpha HOMO= -7.061 LUMO= -0.705 Gap= 6.357 eV

Beta HOMO= -7.051 LUMO= -2.327 Gap= 4.724 eV

--- GEOMETRY ---

|       |       |       |       |
|-------|-------|-------|-------|
| 1-28  | 1-2   | 1-4   | 1-6   |
| 1.828 | 2.025 | 2.031 | 2.031 |

--- WATCHED ATOMS ---

|         | Ni(1) | N(2)   | N(4)   | N(6)   | F(28)  |
|---------|-------|--------|--------|--------|--------|
| q(NPA): | 1.434 | -0.415 | -0.420 | -0.420 | -0.801 |
| s(MPA): | 1.700 | 0.096  | 0.082  | 0.082  | 0.089  |
| s(NPA): | 1.660 | 0.095  | 0.081  | 0.081  | 0.091  |

### [Cu(L)F]

E= -2442.978536 a.u. S\*\*2= 0.752

Alpha HOMO= -6.926 LUMO= -0.847 Gap= 6.080 eV

Beta HOMO= -6.924 LUMO= -4.068 Gap= 2.855 eV

--- GEOMETRY ---

|       |       |       |       |
|-------|-------|-------|-------|
| 1-28  | 1-2   | 1-4   | 1-6   |
| 1.813 | 2.244 | 1.984 | 1.984 |

--- WATCHED ATOMS ---

|         | Cu(1) | N(2)   | N(4)   | N(6)   | F(28)  |
|---------|-------|--------|--------|--------|--------|
| q(NPA): | 1.435 | -0.426 | -0.421 | -0.421 | -0.778 |
| s(MPA): | 0.679 | -0.002 | 0.108  | 0.108  | 0.115  |
| s(NPA): | 0.696 | -0.001 | 0.099  | 0.099  | 0.108  |

### [Zn(L)F]

E= -2581.876960 a.u. S\*\*2= 0.000

HOMO= -7.094 LUMO= -0.732 Gap= 6.361 eV

--- GEOMETRY ---

|       |       |       |       |
|-------|-------|-------|-------|
| 1-28  | 1-2   | 1-4   | 1-6   |
| 1.824 | 2.079 | 2.079 | 2.079 |

--- WATCHED ATOMS ---

|         | Zn(1) | N(2)   | N(4)   | N(6)   | F(28)  |
|---------|-------|--------|--------|--------|--------|
| q(NPA): | 1.669 | -0.476 | -0.475 | -0.475 | -0.865 |
| s(MPA): | 0.000 | 0.000  | 0.000  | 0.000  | 0.000  |
| s(NPA): | 0.000 | 0.000  | 0.000  | 0.000  | 0.000  |

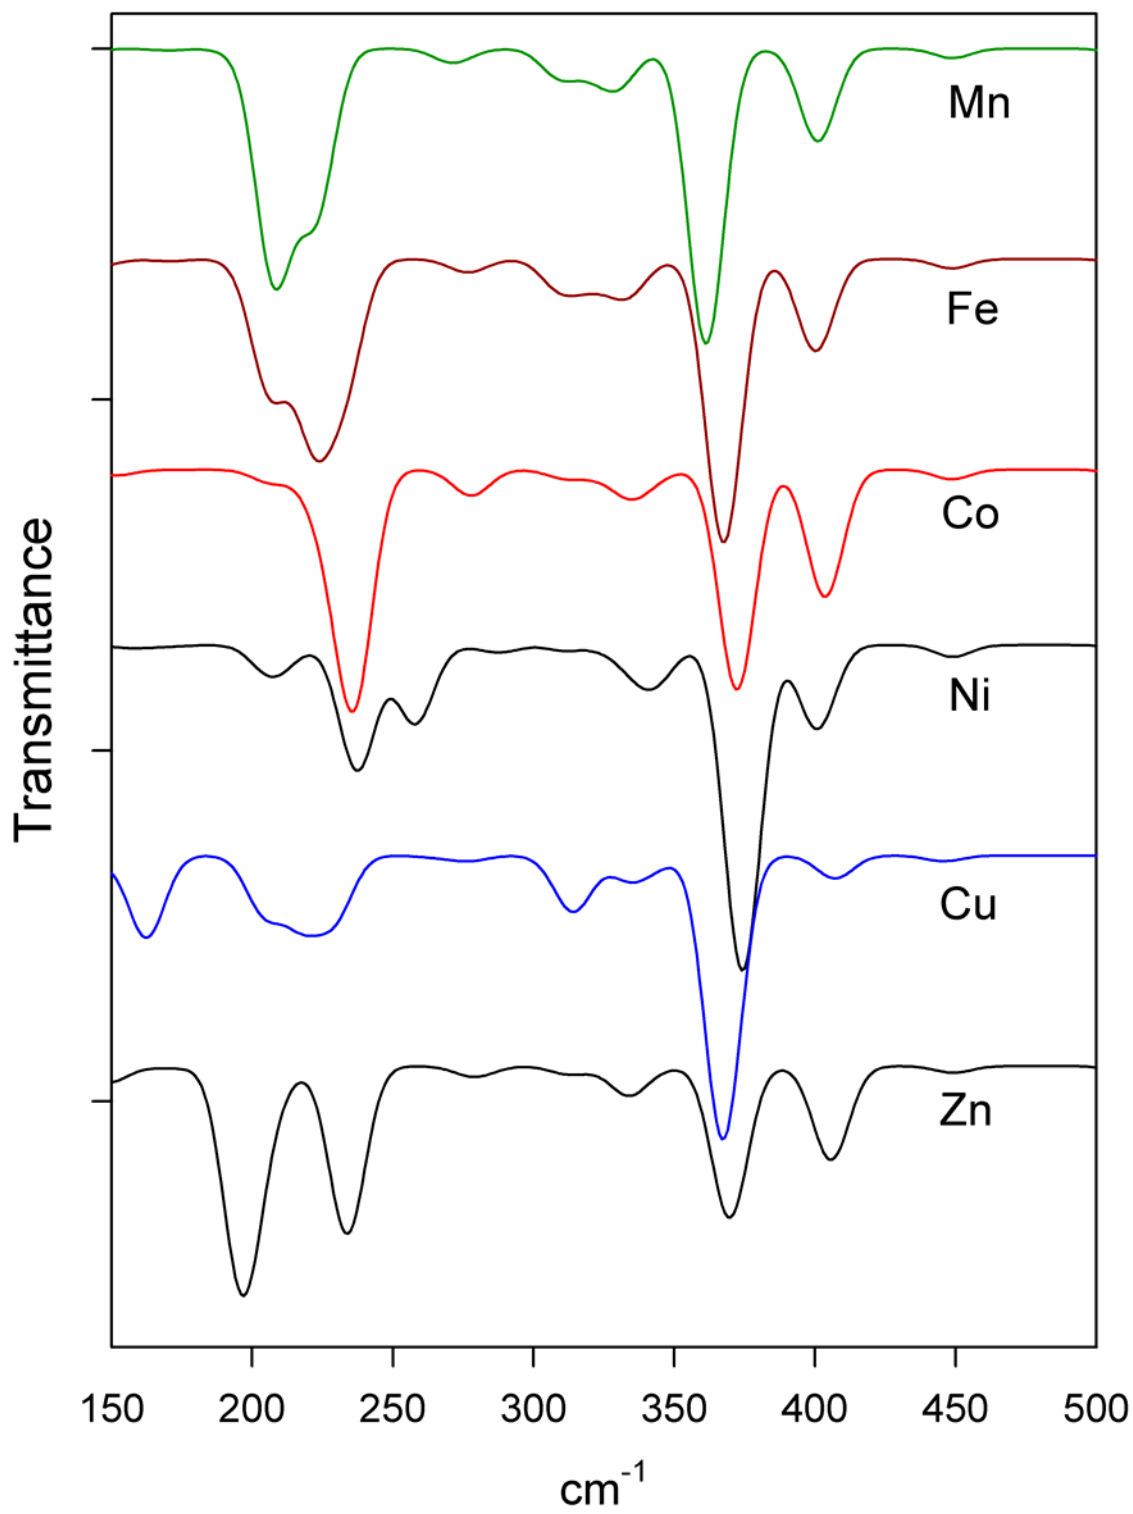

Figure S1. Calculated IR spectra of the [ML(SC<sub>6</sub>F<sub>5</sub>)] complexes.

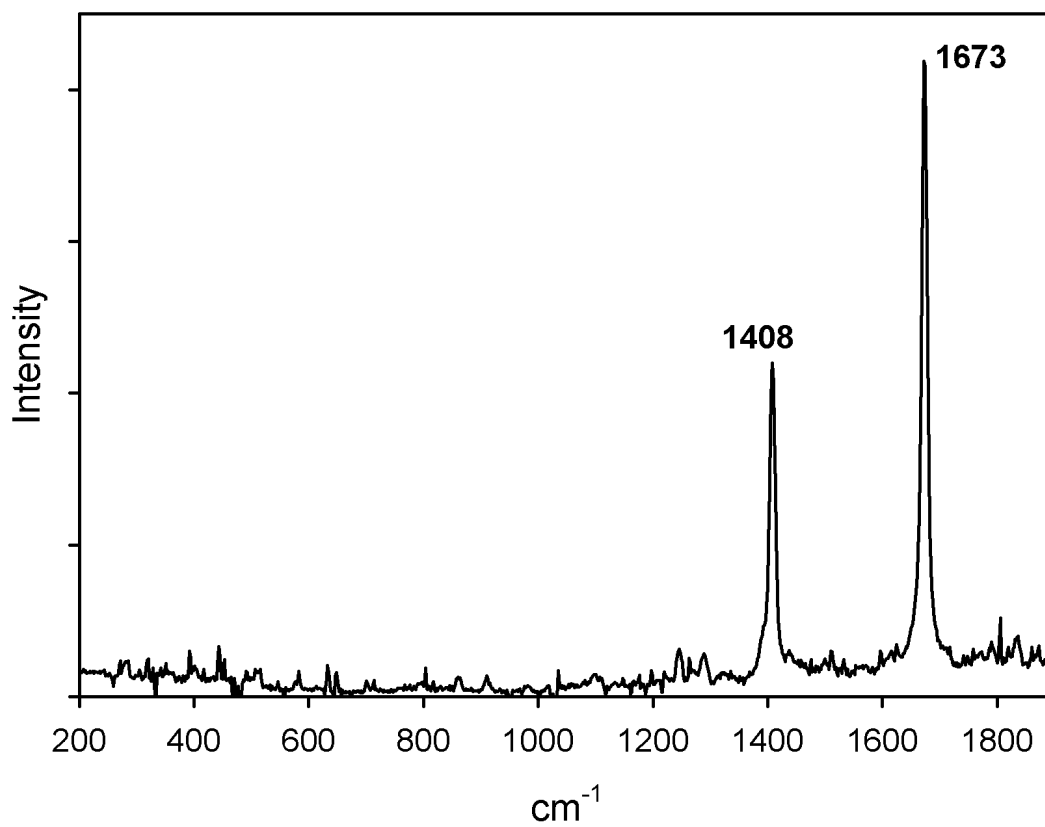

Figure S2. Resonance Raman spectrum of [NiL(SC<sub>6</sub>F<sub>5</sub>)], (excitation wavelength  $\lambda_0$  351 nm).

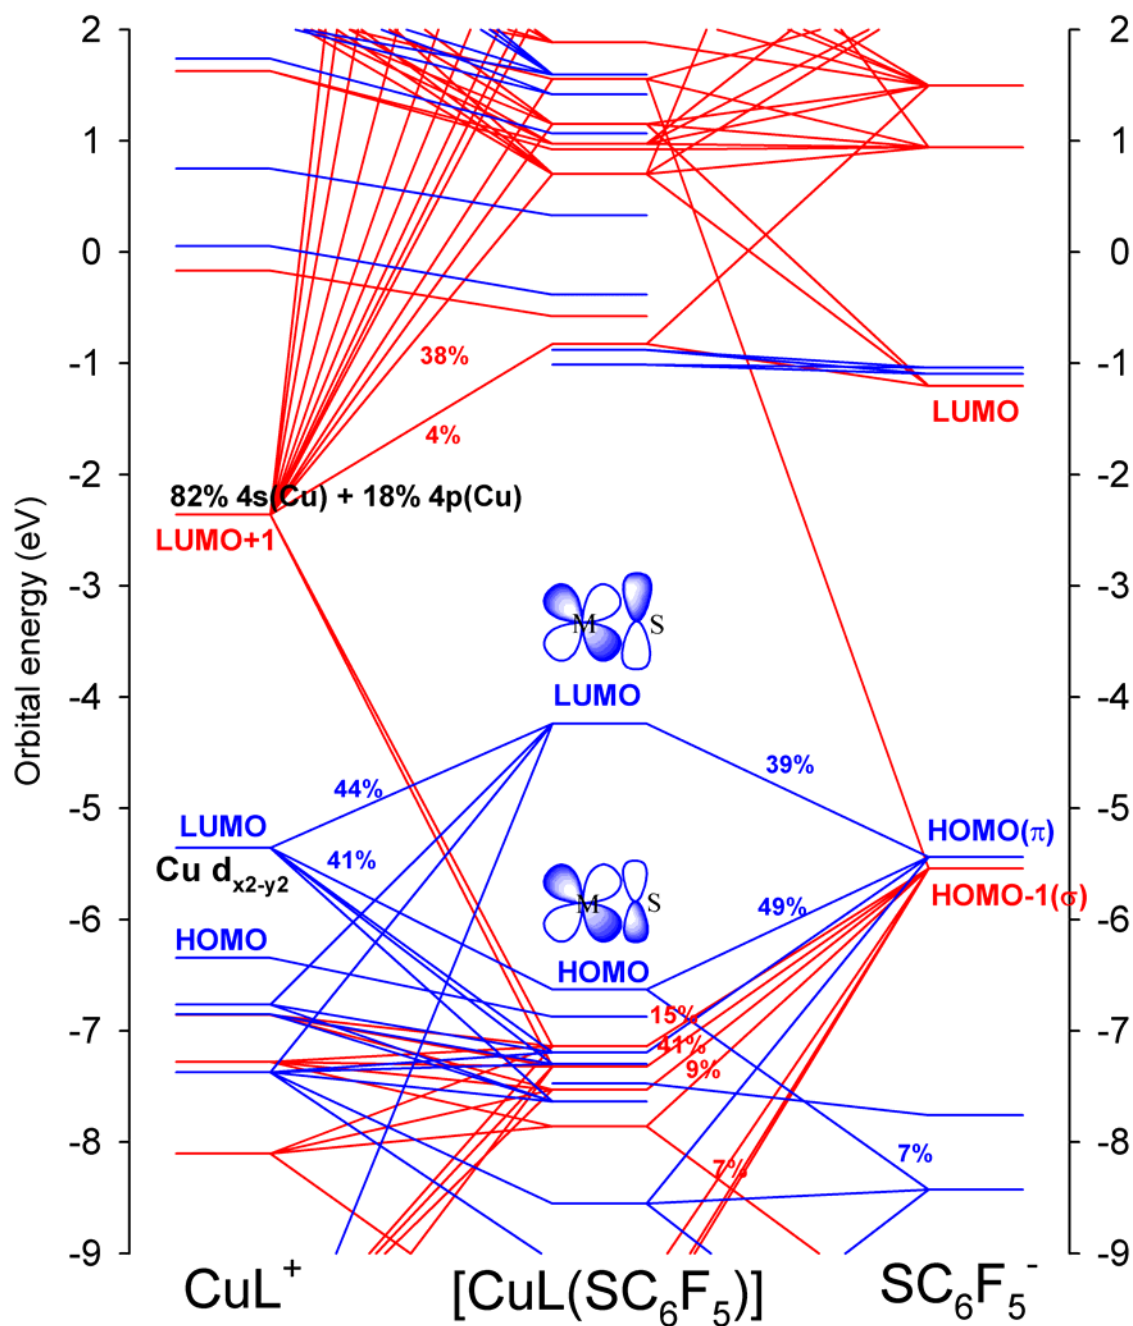

Figure S3.  $\beta$ -Spin orbital interaction diagram illustrating the coupling of the metal and thiolate fragments in the  $[\text{CuL}(\text{SC}_6\text{F}_5)]$  complex (the *AOMix-CDA* calculation, based on B3LYP/TZVP results; MOs with  $a'$  and  $a''$  symmetry are shown in red and blue respectively; molecular orbitals of the  $\text{ML}^+$  and  $\text{SC}_6\text{F}_5^-$  fragments are shifted by 4.0 and -4.5 eV respectively; lines connect all MO-FO orbital pairs with the corresponding MO-FO character greater than 1.9%).

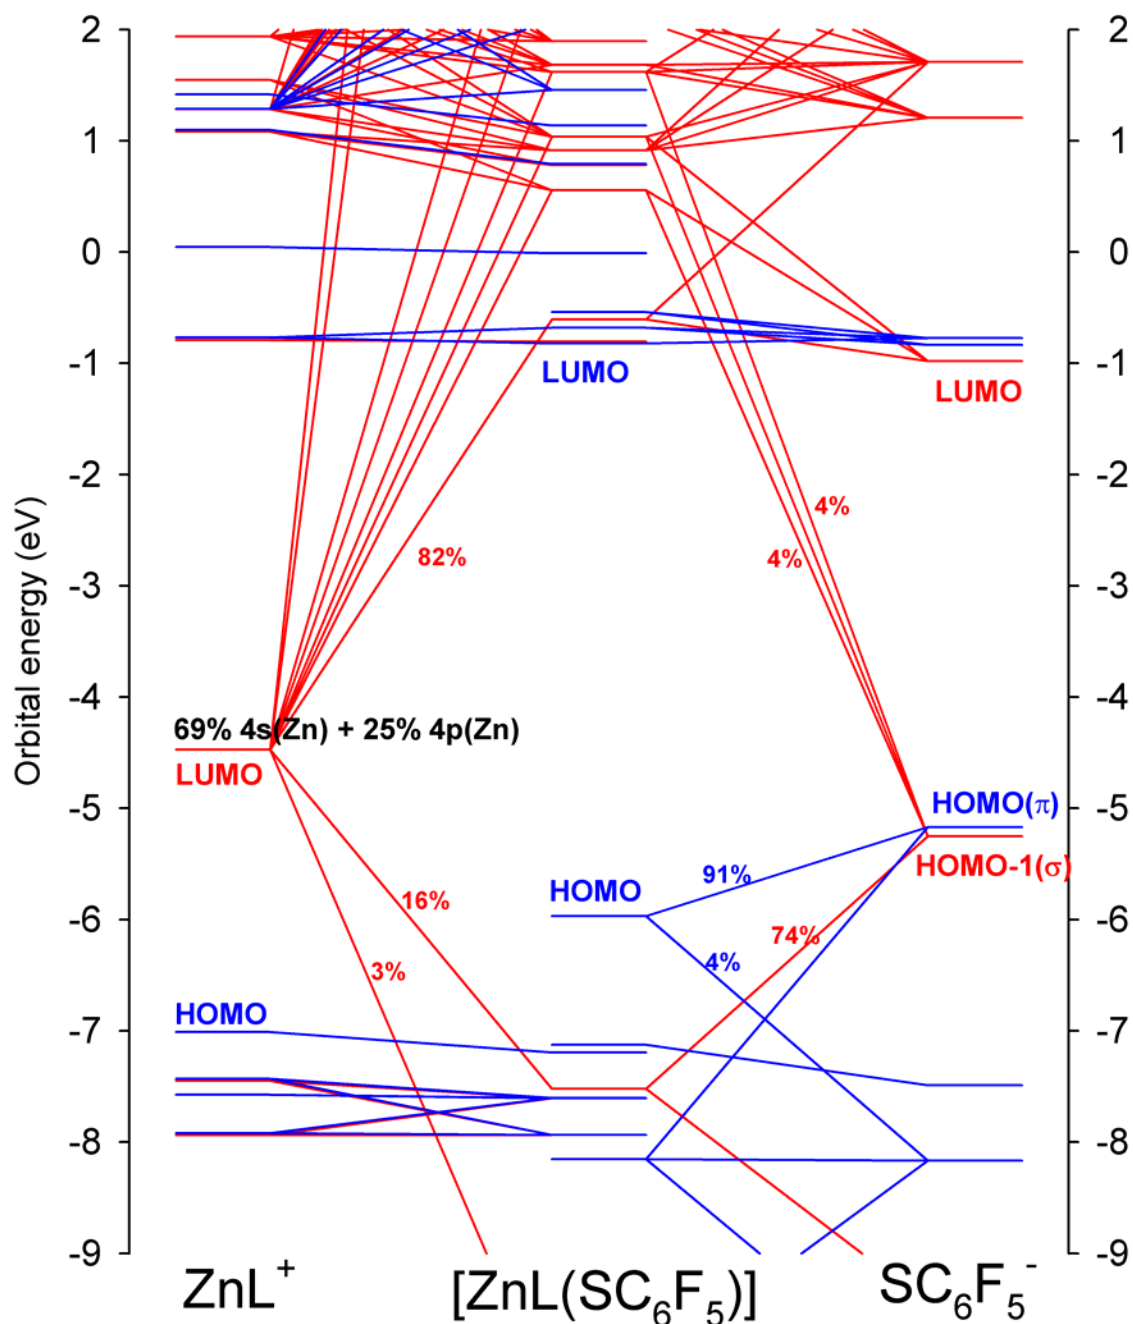

Figure S4. Orbital interaction diagram illustrating the coupling of the metal and thiolate fragments in the  $[\text{ZnL}(\text{SC}_6\text{F}_5)]$  complex (the *AOMix-CDA* calculation, based on B3LYP/TZVP results; MOs with  $a'$  and  $a''$  symmetry are shown in red and blue respectively; molecular orbitals of the  $\text{ML}^+$  and  $\text{SC}_6\text{F}_5^-$  fragments are shifted by 3.3 and -4.2 eV respectively; lines connect all MO-FO orbital pairs with the corresponding MO-FO character greater than 1.9%).

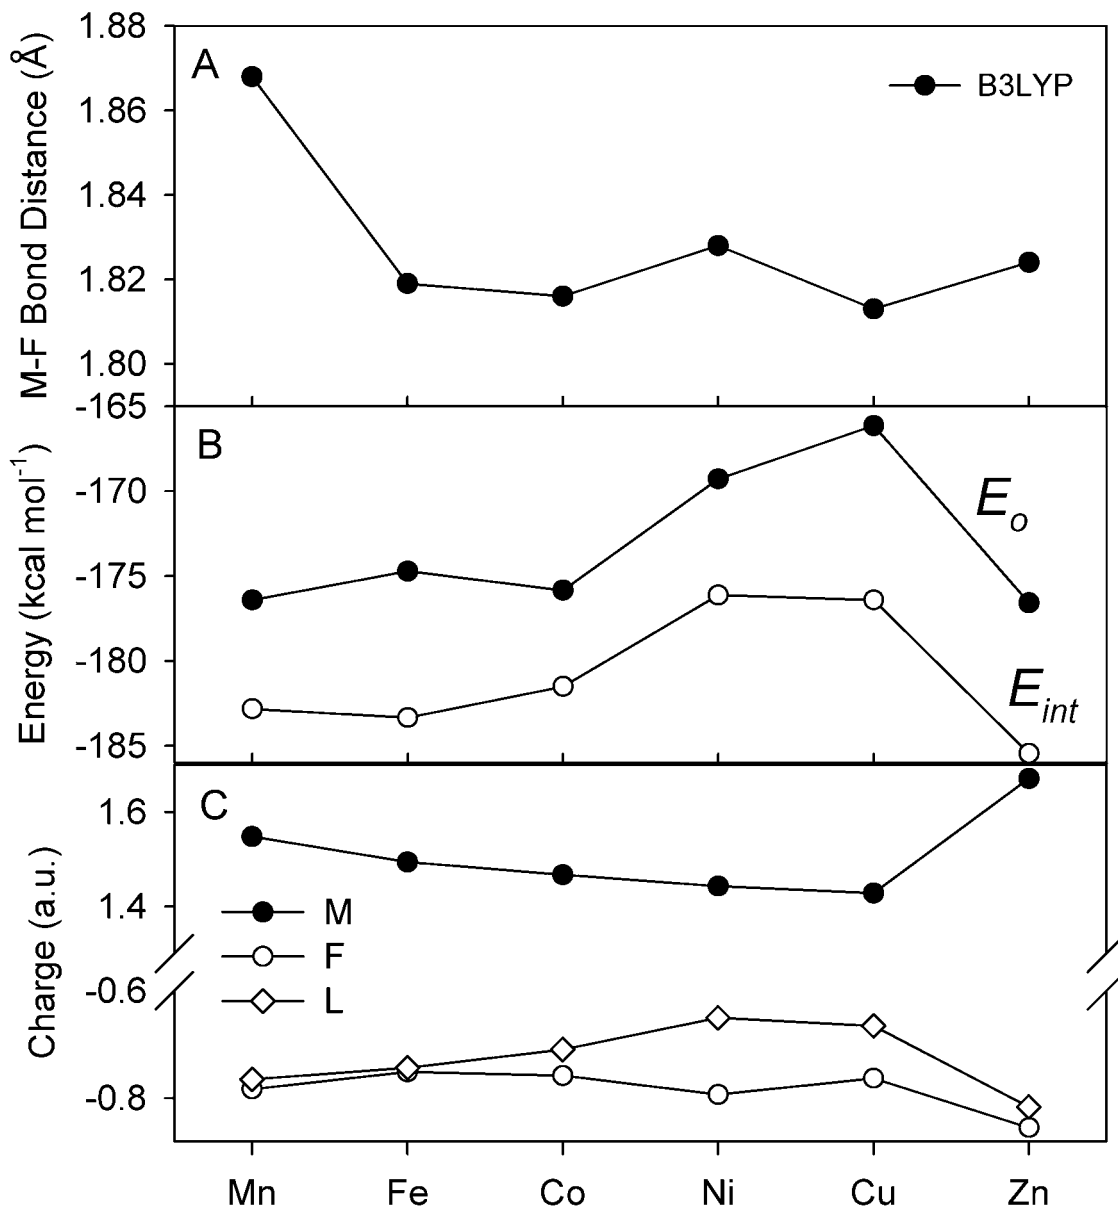

Figure S5. A) Calculated M-S bond lengths in the [ML(F)] complexes; B) calculated binding energies,  $E_o$ , and interaction energies,  $E_{int}$ , between the  $ML^+$  and  $F^-$  fragments; and C) the NPA charges of the metal and fluorine atoms and the pyrazolyl ligand L.



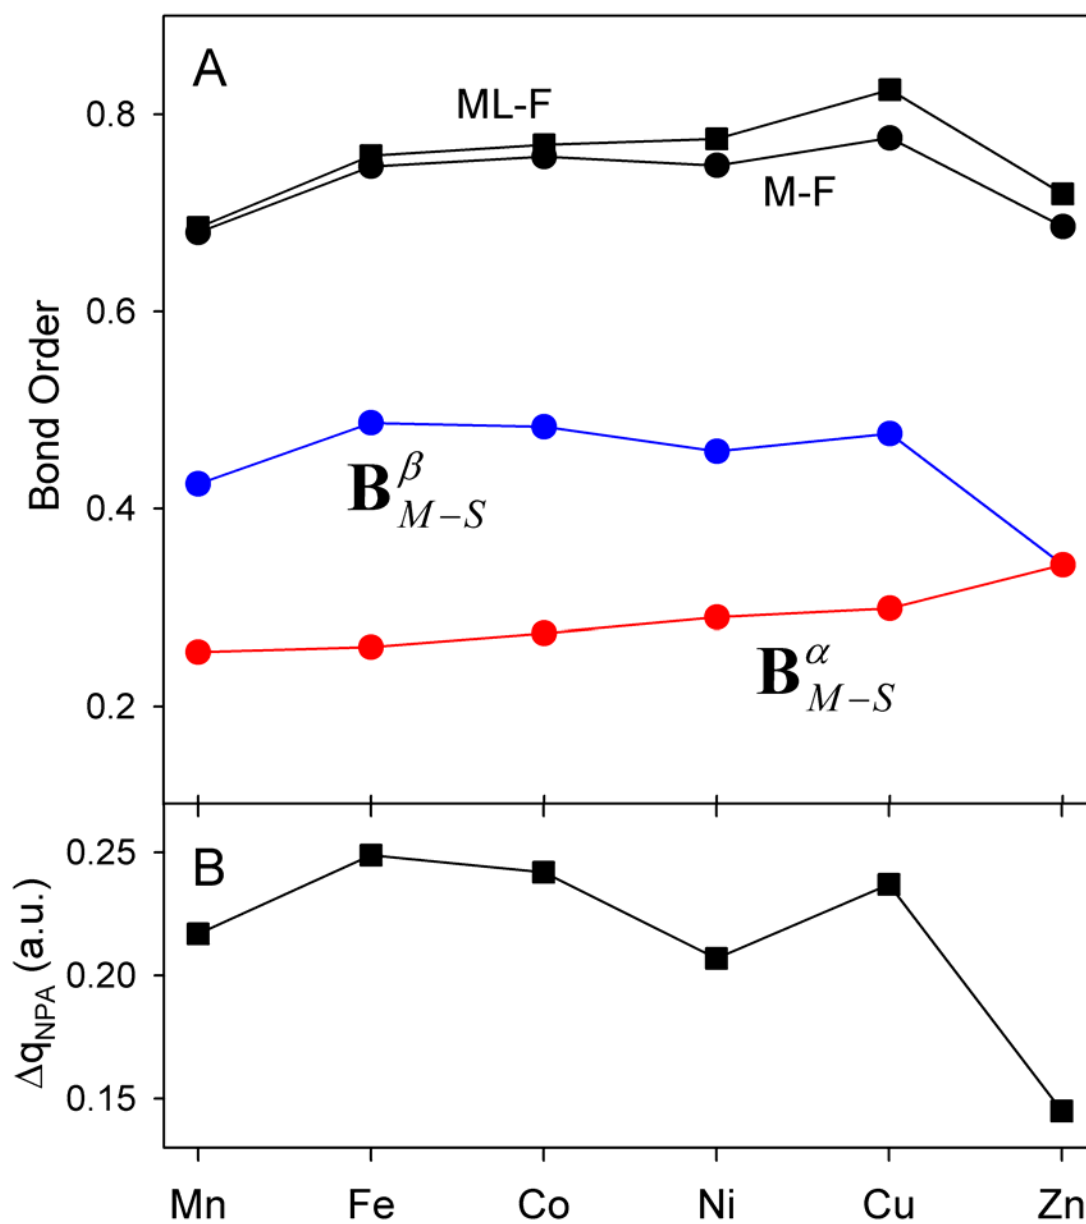

Figure S6. A) The M-S bond order (black circles) and its  $\alpha$ -spin and  $\beta$ -spin orbital components (red and blue circles, respectively) and the bond order between the  $\text{ML}^+$  and  $\text{F}^-$  fragments (black squares) in the  $[\text{ML}(\text{F})]$  complexes and B) the charge donation from the  $\text{F}^-$  ligand to the  $\text{ML}^+$  fragment.

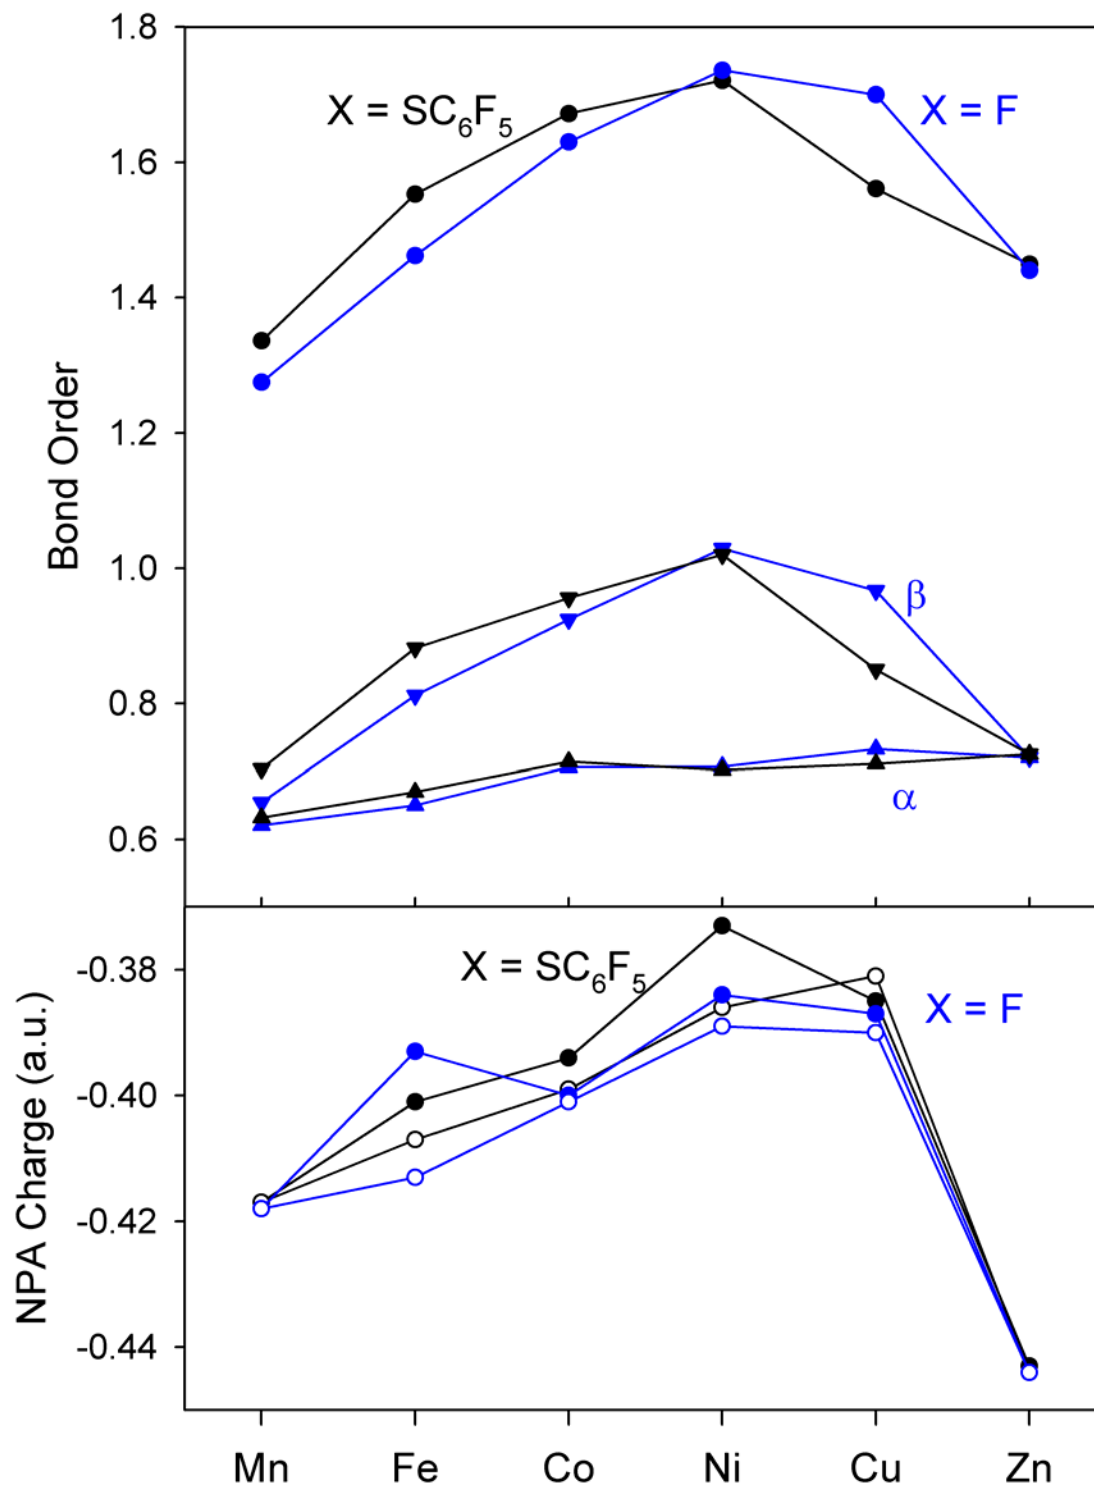

Figure S7. A) The metal - pyrazolyl ligand bond orders (solid circles) and its  $\alpha$ - and  $\beta$ -MO components (upper triangles and lower triangles, respectively) and the bond order and B) The NPA charges of N2,N4, and N6 atoms of pyrazolyl ligand. The data for the [ML(SC<sub>6</sub>F<sub>5</sub>)] and [ML(F)] complexes are shown in black and blue respectively.
